# Supplementary material
Source: publisher figshare collection journal article supplement (https://acs.figshare.com/ndownloader/files/5104684)
Supplement: Supplementary file 1 [file 5104684]

# ESI-MS Studies on the Mechanism of Pd(0)-Catalyzed Three-Component Tandem Double Addition-Cyclization Reaction

Hao Guo,<sup>a</sup> Rong Qian,<sup>b</sup> Yuanxi Liao,<sup>b</sup> Shengming Ma,<sup>a\*</sup> and Yinlong Guo<sup>b\*</sup>

<sup>a</sup> State Key Laboratory of Organometallic Chemistry, Shanghai Institute of Organic Chemistry, Chinese Academy of Sciences, 354 Fenglin Road, Shanghai 200032, P. R. China

Fax: (+86)21-64167510, E-mail: [masm@mail.sioc.ac.cn](mailto:masm@mail.sioc.ac.cn)

<sup>b</sup> Shanghai Mass Spectrometry Center, Shanghai Institute of Organic Chemistry Chinese Academy of Sciences, 354 Fenglin Road, Shanghai 200032, P. R. China

Fax: (+86)21-64166128, E-mail: [ylguo@mail.sioc.ac.cn](mailto:ylguo@mail.sioc.ac.cn)

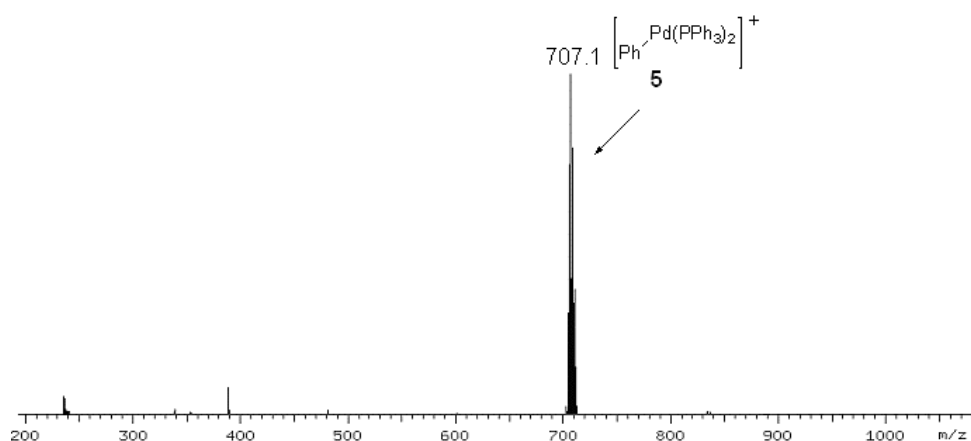

**Figure S1.** ESI(+)-MS carried out with a CapExit voltage of 52.6 V for the sample taken from the reaction mixture of iodobenzene **2** (0.06 mmol) and Pd(PPh<sub>3</sub>)<sub>4</sub> (0.0025 mmol) in THF (6 mL) stirred at rt in a nitrogen atmosphere at the reaction time of 30 min and diluted by the mixed CH<sub>3</sub>CN and CH<sub>3</sub>OH (v/v=1:1).

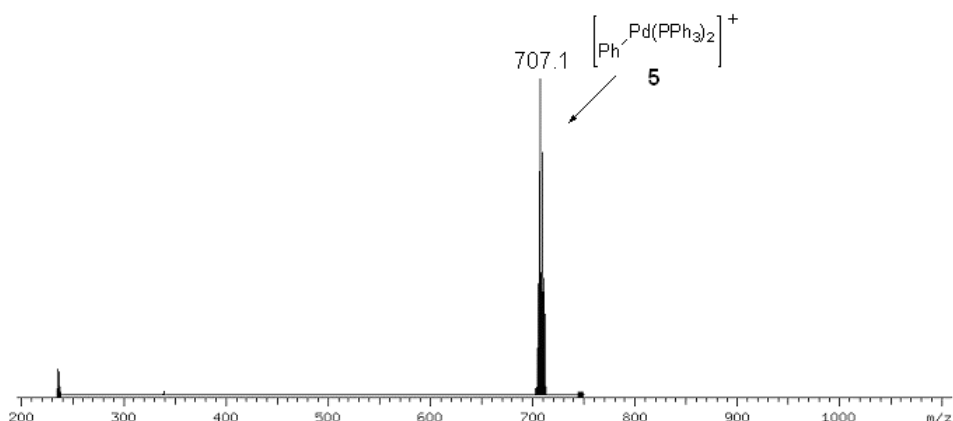

**Figure S2.** ESI(+)-MS carried out with a CapExit voltage of 52.6 V for the sample taken from the reaction mixture of iodobenzene **2** (0.06 mmol) and  $\text{Pd(PPh}_3)_4$  (0.0025 mmol) in THF (6 mL) stirred at  $85^\circ\text{C}$  in a nitrogen atmosphere at the reaction time of 30 min and diluted by the mixed  $\text{CH}_3\text{CN}$  and  $\text{CH}_3\text{OH}$  (v/v=1:1).

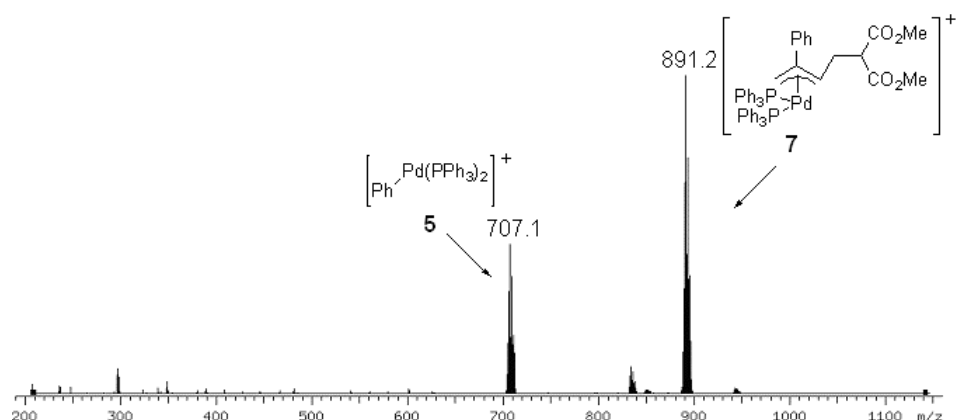

**Figure S3.** ESI(+)-MS carried out with the standard procedure for MS detection for the sample taken from the reaction mixture of 2-(2, 3-allenyl)malonate **1** (0.05 mmol), iodobenzene **2** (0.06 mmol) and  $\text{Pd(PPh}_3)_4$  (0.0025 mmol) in THF (6 mL) stirred at  $85^\circ\text{C}$  in a nitrogen atmosphere at the reaction time of 30 min.

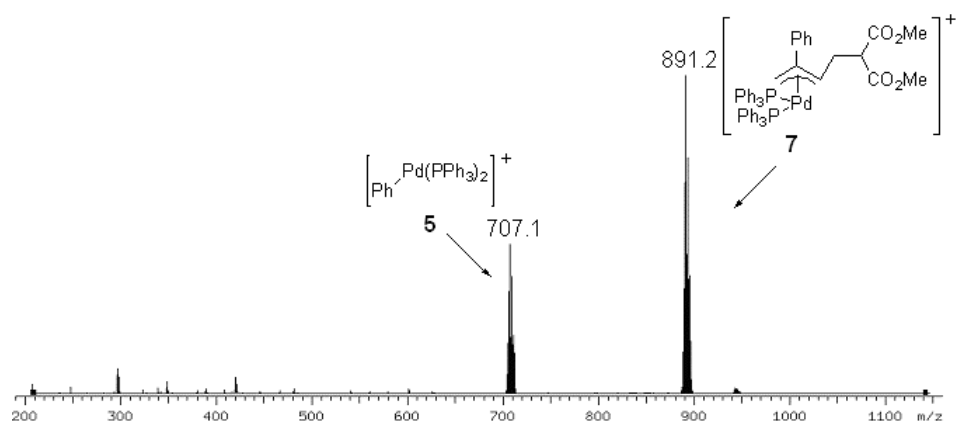

**Figure S4.** ESI(+)-MS carried out with the standard procedure for MS detection for the sample taken from the reaction mixture of 2-(2, 3-allenyl)malonate **1** (0.05 mmol), iodobenzene **2** (0.06 mmol), imine **3** (0.06 mmol), and  $\text{Pd}(\text{PPh}_3)_4$  (0.0025 mmol) in THF (6 mL) stirred at  $85^\circ\text{C}$  in a nitrogen atmosphere at the reaction time of 1 h. (The MS results for the samples taken at the reaction time between 30 min to 2 h were similar to this spectra.)

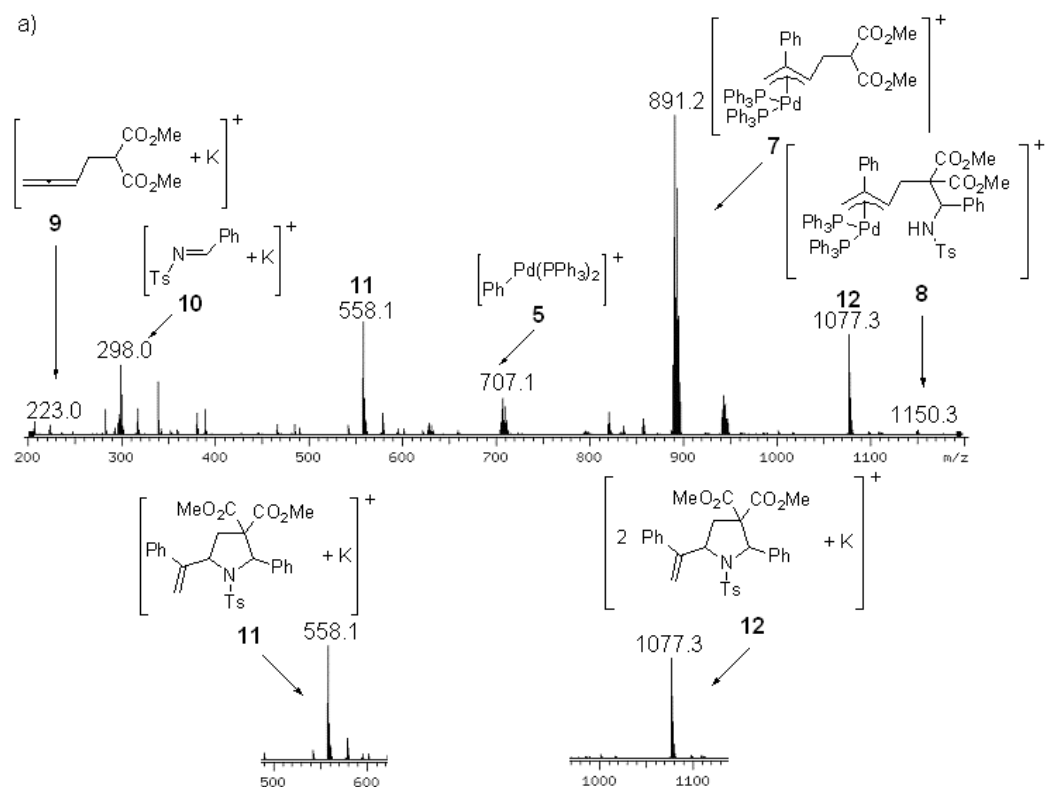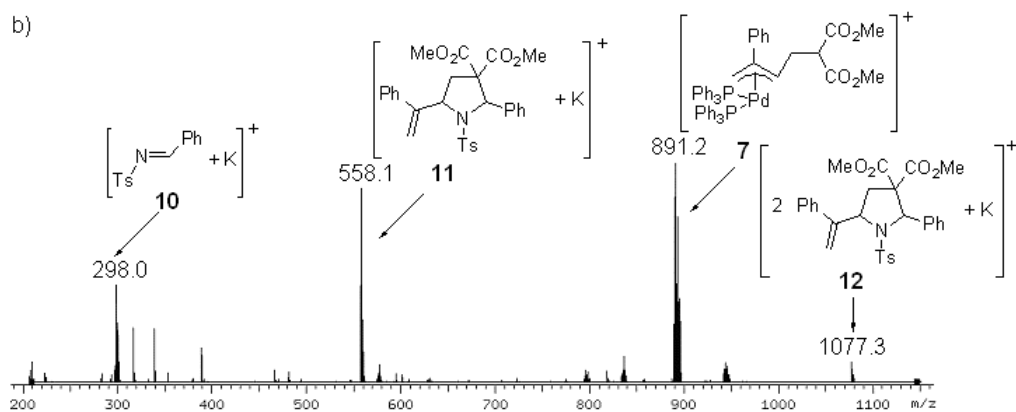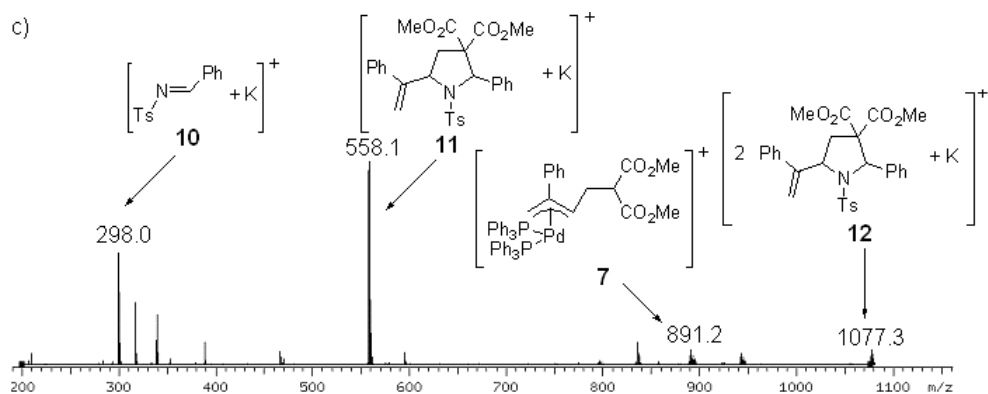

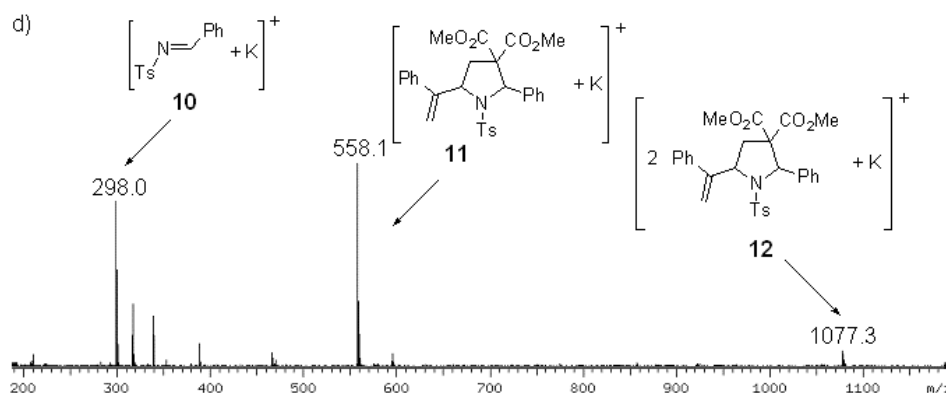

**Figure S5.** ESI(+)-MS carried out with the standard procedure for MS detection for the sample taken from the reaction mixture of 2-(2, 3-allenyl)malonate **1** (0.05 mmol), iodobenzene **2** (0.06 mmol), imine **3** (0.06 mmol),  $\text{Pd}(\text{PPh}_3)_4$  (0.0025 mmol), and  $\text{K}_2\text{CO}_3$  (0.05 mmol) in THF (6 mL) stirred at  $85^\circ\text{C}$  in a nitrogen atmosphere at the reaction time of a) 5 h, b) 15 h, c) 24 h, and d) 36 h.

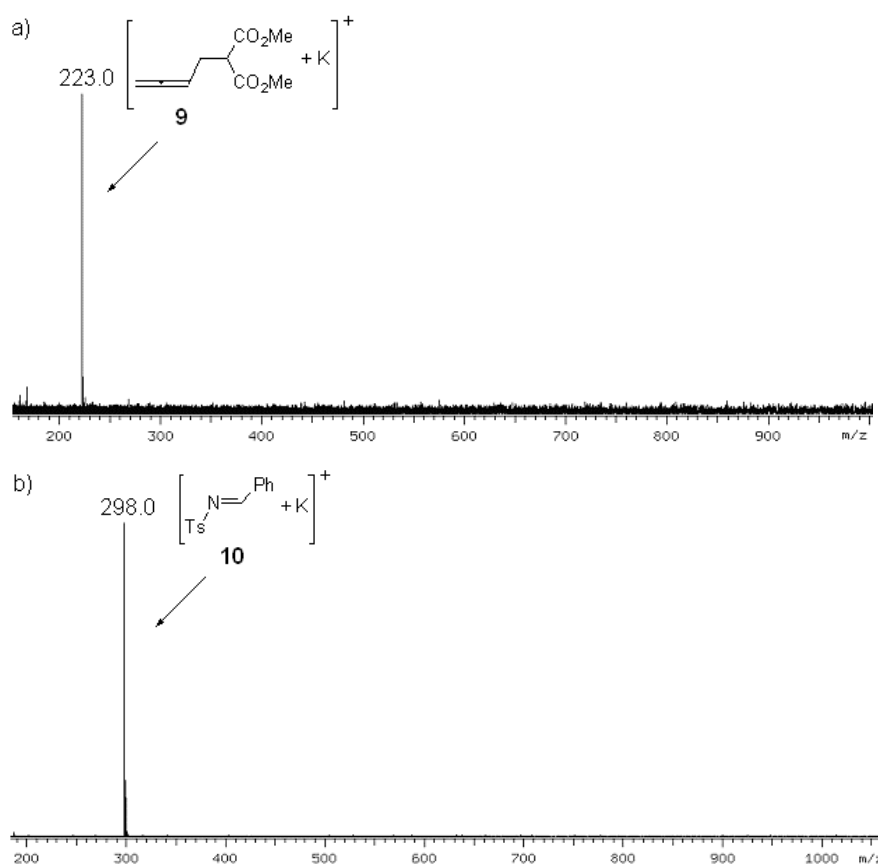

**Figure S6.** ESI(+)-MS carried out with a CapExit voltage of 52.6 V for a) 2-(2,

3-allenyl)malonate **1** and b) imine **3**, diluted by a solution of CH<sub>3</sub>CN saturated with K<sub>2</sub>CO<sub>3</sub>.

## Experimental and theoretical isotopic distribution of the palladium intermediate ions.

a) Experimental isotopic distributions of intermediate **5**.

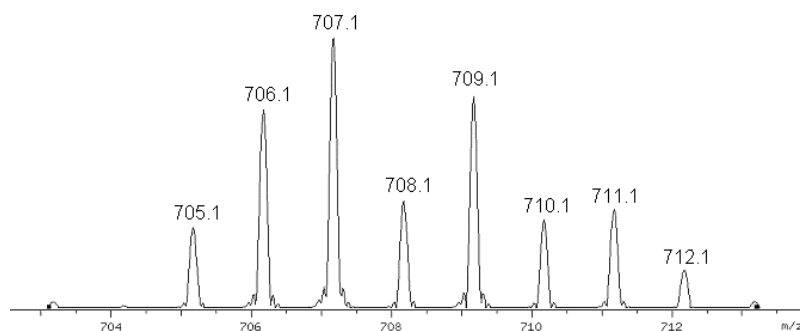

Theoretical isotopic distributions of intermediate **5**.

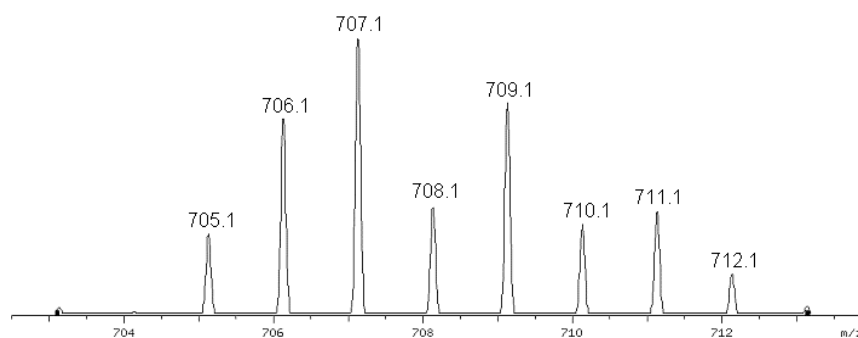

**Table 1.** Experimental and theoretical isotopic distribution of intermediate **5**.

| $m/z$ | Experimental mass | Theoretical mass | Relative error (ppm) |
|-------|-------------------|------------------|----------------------|
| 705.1 | 705.1241          | 705.1249         | -1.1                 |
| 706.1 | 706.1264          | 706.1264         | 0                    |
| 707.1 | 707.1263          | 707.1259         | 0.6                  |
| 708.1 | 708.1292          | 708.1286         | 0.8                  |
| 709.1 | 709.1261          | 709.1255         | 0.8                  |
| 710.1 | 710.1287          | 710.1284         | 0.4                  |
| 711.1 | 711.1278          | 711.1271         | 1.0                  |
| 712.1 | 712.1299          | 712.1298         | 0.1                  |

b) Experimental isotopic distributions of intermediate **6**.

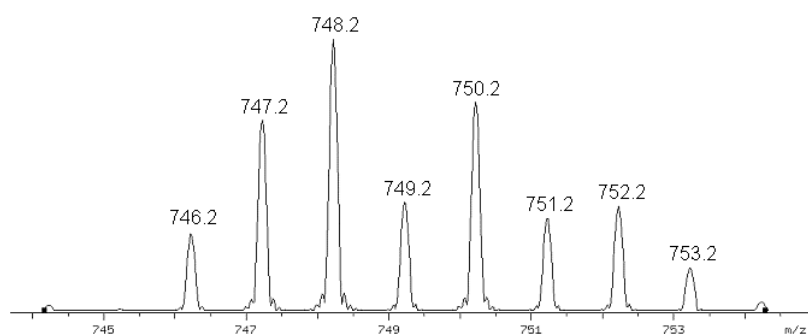

Theoretical isotopic distributions of intermediate **6**.

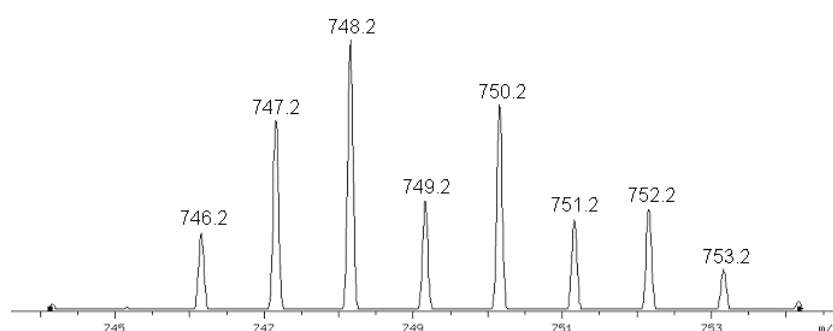

**Table 2.** Experimental and theoretical isotopic distribution of intermediate **6**.

| $m/z$ | Experimental mass | Theoretical mass | Relative error (ppm) |
|-------|-------------------|------------------|----------------------|
| 746.2 | 746.1513          | 746.1515         | -0.3                 |
| 747.2 | 747.1529          | 747.1529         | 0                    |
| 748.2 | 748.1527          | 748.1525         | 0.3                  |
| 749.2 | 749.1550          | 749.1551         | -0.1                 |
| 750.2 | 750.1517          | 750.1521         | -0.5                 |
| 751.2 | 751.1549          | 751.1549         | 0                    |
| 752.2 | 752.1542          | 752.1537         | 0.7                  |
| 753.2 | 753.1570          | 753.1563         | 0.9                  |



c) Experimental isotopic distributions of intermediate **7**.

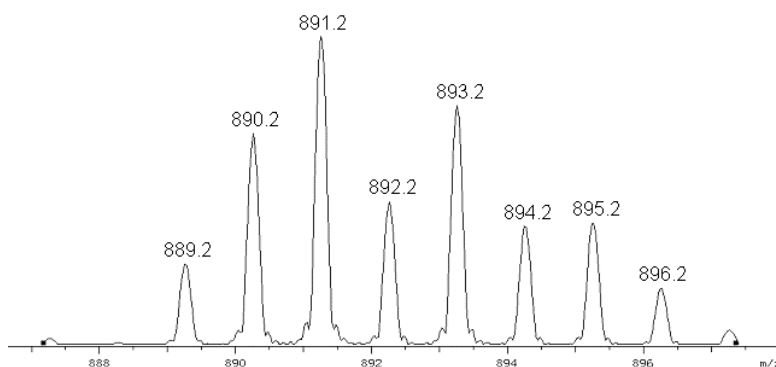

Theoretical isotopic distributions of intermediate **7**.

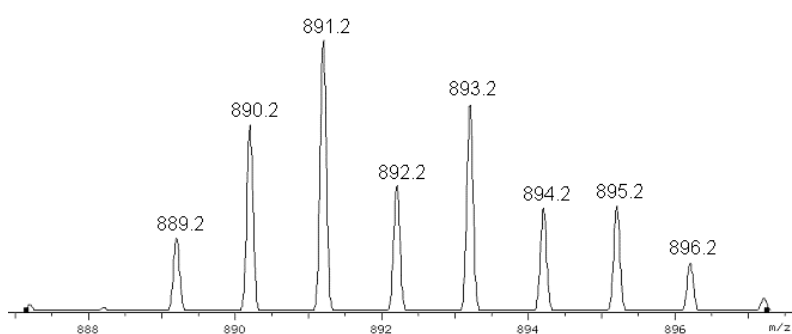

**Table 3.** Experimental and theoretical isotopic distribution of intermediate **7**.

| $m/z$ | Experimental mass | Theoretical mass | Relative error (ppm) |
|-------|-------------------|------------------|----------------------|
| 889.2 | 889.1984          | 889.1986         | -0.2                 |
| 890.2 | 890.2006          | 890.2000         | 0.7                  |
| 891.2 | 891.1999          | 891.1997         | 0.2                  |
| 892.2 | 892.2024          | 892.2023         | 0.1                  |
| 893.2 | 893.1992          | 893.1994         | -0.2                 |
| 894.2 | 894.2016          | 894.2021         | -0.6                 |
| 895.2 | 895.2005          | 895.2011         | -0.7                 |
| 896.2 | 896.2029          | 896.2036         | -0.8                 |

d) Experimental isotopic distributions of intermediate **8**.

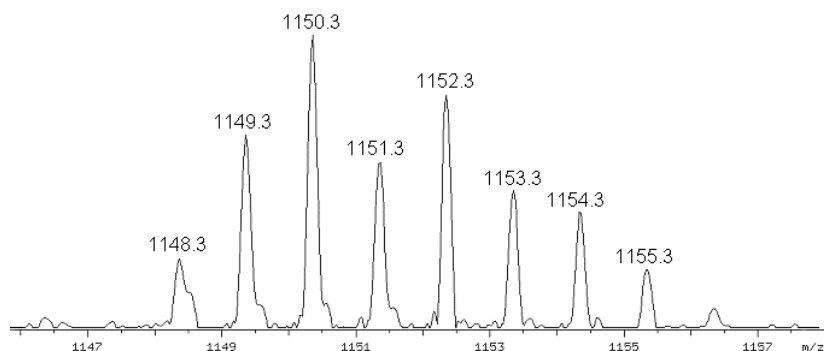

Theoretical isotopic distributions of intermediate **8**.

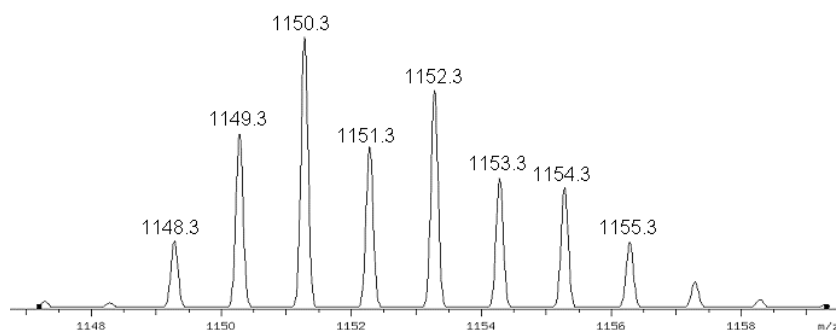

**Table 4.** Experimental and theoretical isotopic distribution of intermediate **8**.

| $m/z$  | Experimental mass | Theoretical mass | Relative error (ppm) |
|--------|-------------------|------------------|----------------------|
| 1148.3 | 1148.2659         | 1148.2653        | 0.5                  |
| 1149.3 | 1149.2668         | 1149.2667        | 0.1                  |
| 1150.3 | 1150.2657         | 1150.2666        | -0.8                 |
| 1151.3 | 1151.2680         | 1151.2688        | -0.7                 |
| 1152.3 | 1152.2660         | 1152.2665        | -0.4                 |
| 1153.3 | 1153.2683         | 1153.2688        | -0.4                 |
| 1154.3 | 1154.2684         | 1154.2680        | 0.3                  |
| 1155.3 | 1155.2706         | 1155.2701        | 0.4                  |
